# Supplementary material for: Moving beyond pain scores: Multidimensional pain assessment is essential for adequate pain management after surgery
Source: PubMed Central journal article supplement (PMC5425226; doi:10.1371/journal.pone.0177345), 2017-05-10
Supplement: pone.0177345.s001.pdf [file pone.0177345.s001.pdf]

**S1 Table. Surgical procedures, categorized in ten groups**

| Group                   | N     | Procedure                                                                                                                                                                                                                        |
|-------------------------|-------|----------------------------------------------------------------------------------------------------------------------------------------------------------------------------------------------------------------------------------|
| Laparotomy              | 3,610 | Hyperthermic Intraperitoneal Chemotherapy (HIPEC), colectomy, hepatectomy, Whipple procedure (pancreaticoduodenectomy), pelvic or retroperitoneal lymph node dissection, Oscar Ramirez procedure (abdominoplasty), adhesiolysis. |
| Upper laparotomy        | 1,857 | Gastrectomy, pancreatectomy, splenectomy, esophageal resection, cholecystectomy.                                                                                                                                                 |
| Lower laparotomy        | 2,792 | Abdominal hysterectomy, appendectomy, cystectomy, prostatectomy, sectio caesarea, debulking, rectum or sigmoid resection.                                                                                                        |
| Laparoscopy             | 581   | Laparoscopic cholecystectomy, nephrectomy, colectomy, adrenalectomy, prostatectomy, hysterectomy.                                                                                                                                |
| Sternotomy              | 62    | Coronary bypass, thymectomy, metastasectomy, pericard resection.                                                                                                                                                                 |
| Thoracotomy             | 943   | Lobectomy, pneumectomy, tracheal resection.                                                                                                                                                                                      |
| Thoracoscopy            | 402   | Video assisted surgery or thorascopic surgery, such as pleurectomy, bullectomy, Nussbar surgery, video-assisted thorascopic surgery.                                                                                             |
| Flank                   | 311   | Nephrectomy, adrenalectomy.                                                                                                                                                                                                      |
| Orthopaedic surgery     | 2,966 | Total knee arthroplasty, total hip arthroplasty, acetabulum arthroplasty, arthrodesis of limbs, arthrotomy, osteotomy, amputation of limbs, pelvectomy, total shoulder arthroplasty, hand surgery, foot surgery.                 |
| Remainder of procedures | 1,870 | Hernia inguinalis, mastectomy, lumpectomy, laminectomy, spondylodesis, head or face surgery.                                                                                                                                     |
