# Supplementary material for: Moving beyond pain scores: Multidimensional pain assessment is essential for adequate pain management after surgery
Source: PubMed Central journal article supplement (PMC5425226; doi:10.1371/journal.pone.0177345), 2017-05-10
Supplement: pone.0177345.s002.pdf [file pone.0177345.s002.pdf]

**S2 Table.** Number of patients, number of unique, individual patients and the number of assessments of patients categorized per day or per combination of days.

| <b>Pain assessment on</b> | <b>Day 1</b> | <b>Day 2</b> | <b>Day 3</b> | <b>Unique patients</b> | <b>Assessments</b> |
|---------------------------|--------------|--------------|--------------|------------------------|--------------------|
| Only day 1                | 4,327        | 0            | 0            | 4,327                  | 4,327              |
| Only day 2                | 0            | 393          | 0            | 393                    | 393                |
| Only day 3                | 0            | 0            | 88           | 88                     | 88                 |
| Day 1 & 2                 | 1,748        | 1,748        | 0            | 1,748                  | 3,496              |
| Day 1 & 3                 | 145          | 0            | 145          | 145                    | 290                |
| Day 2 & 3                 | 0            | 343          | 343          | 343                    | 686                |
| Day 1 & 2 & 3             | 2,038        | 2,038        | 2,038        | 2,038                  | 6,114              |
| <b>Total</b>              | <b>8,258</b> | <b>4,522</b> | <b>2,614</b> | <b>9,082</b>           | <b>15,394</b>      |
