# Supplementary material for: Moving beyond pain scores: Multidimensional pain assessment is essential for adequate pain management after surgery
Source: PubMed Central journal article supplement (PMC5425226; doi:10.1371/journal.pone.0177345), 2017-05-10
Supplement: pone.0177345.s003.pdf [file pone.0177345.s003.pdf]

### S1 Fig. Results from logistic regression.

Using the sample data, an iterative process (maximum likelihood) produces an estimated logistic regression equation of the form

$$\text{logit}(p) = \log_e \frac{p}{1-p} = a + b_1 NRS + b_2 A + b_3 G + b_4 BMI \quad (1)$$

where:

- *NRS*, *A*, *G* and *BMI* are the explanatory variables (Table 1 in the Methods section);
- *p* is the estimated value of the true probability that a patient with a particular set of values for the explanatory variables has the outcome of interest, for example the patient moves appropriately;
- *a* is the estimated constant term;
- *b<sub>1</sub>*, *b<sub>2</sub>*, *b<sub>3</sub>*, and *b<sub>4</sub>* are the estimated logistic regression coefficients.

We can manipulate equation (1) to estimate the probability that a patient has the outcome of interest. After simplifying (as *A*, *G* and *BMI* proved to be of no influence), we first calculate for a patient with a particular *NRS*,

$$S = a + b_1 NRS \quad (2)$$

Then, the probability that a patient has the outcome of interest is estimated as

$$p = \frac{e^S}{1+e^S} \quad (3)$$

and the probability that a patient does not have the outcome of interest as

$$1 - p = \frac{1}{1+e^S} \quad (4)$$

The probability *p* decreases from one to zero, for *S* decreasing from plus to minus infinity.

Noticeably, equation (3) shows that the probability *p*=0.5 for *S*=0 or *NRS* = *-a/b<sub>1</sub>*. Table S3.1 lists the estimated constant terms and logistic regression coefficients.

**Table S3.1.** Results from the logistic regression model using the 11-points Numerical Rating Scale for movement-evoked pain as explanatory variable for each of the three dependent variables PO, NO, and PONO. Listed are constant term  $\alpha$  and logistic regression coefficient  $b_1$  from equation (2), as well as the odds ratio (OR) with its 95% Wald confidence interval.

| Day after surgery | Dependent variable | $\alpha$ (SE)   | $b_1$ (SE)       | OR (95% CI)         |
|-------------------|--------------------|-----------------|------------------|---------------------|
| 1                 | PO                 | 4.1156 (0.0943) | -0.6039 (0.0166) | 0.547 (0.529-0.565) |
|                   | NO                 | 4.7171 (0.1120) | -0.7773 (0.0197) | 0.460 (0.442-0.478) |
|                   | PONO               | 3.5161 (0.0871) | -0.6805 (0.0169) | 0.506 (0.490-0.523) |
| 2                 | PO                 | 3.8677 (0.1243) | -0.5303 (0.0224) | 0.588 (0.563-0.615) |
|                   | NO                 | 5.0953 (0.1651) | -0.7912 (0.0288) | 0.453 (0.428-0.480) |
|                   | PONO               | 3.4504 (0.1156) | -0.6220 (0.0224) | 0.537 (0.514-0.561) |
| 3                 | PO                 | 3.4035 (0.1430) | -0.4578 (0.0275) | 0.633 (0.600-0.668) |
|                   | NO                 | 5.3441 (0.2248) | -0.8378 (0.0402) | 0.433 (0.400-0.468) |
|                   | PONO               | 3.1292 (0.1364) | -0.5719 (0.0280) | 0.564 (0.534-0.596) |

PO, patient's opinion on whether the pain is acceptable; NO, nurses' observation on the patient's ability to make appropriate movements; PONO, combined measure of PO and NO: is "acceptable pain" associated with "good appropriate movements" or not.

The values in Table S3.1 can be used to calculate  $S$  (eq. 2) and the probabilities given in equations (3) and (4). For example, a patient has NRS=4 on day 1. The probability that this patient moves appropriately is 0.833, whereas the probability of not moving appropriately is 0.167. The odds of moving appropriately is  $p/(1-p) = 0.833/0.167 = 4.99$ . Alternatively, combining equations (3) and (4) yields  $p/(1-p) = e^S = e^{4.7171-0.7773 \times 4} = 4.99$ .

Although mathematically correct, we should not apply estimates on the probability scale to individual subjects like we did in the example. Each individual subject reporting NRS=4 either does or does not move appropriately. The estimated probabilities from a logistic regression model are best viewed as estimates of proportions in the underlying population. As a result, we better express the result for the example as: the estimated proportion of patients that move appropriately at NRS=4 is 0.833. A confidence interval for an estimated proportion can be calculated. We therefore refer to Hosmer and Lemeshow.<sup>†</sup>

The odds ratio (OR) in the example is calculated as follows. For an  $NRS=4$ , it is the estimated odds of moving appropriately for  $NRS=5$  relative to the estimated odds of moving appropriately for  $NRS=4$ . As the odds with  $NRS=5$  is  $e^{4.7171-0.7773 \times 5} = 2.30$ , the  $OR = 2.30/4.99 = 0.46$ . Alternatively, it can be shown that the  $OR = e^{b_1} = e^{-0.7773} = 0.46$ , as  $NRS$  increases by one unit. If the  $OR$  is equal to one, then the two odds are the same. An  $OR > 1$  indicates an increased odds of moving appropriately, and an  $OR < 1$  indicates a decreased odds of moving appropriately, as  $NRS$  increases by one unit.

A measure of the model's ability to discriminate between those subjects who experience the outcome of interest *versus* those who do not is provided by the area under the Receiver Operating Characteristic (ROC) curve (Figure S3.1).<sup>††</sup> It plots sensitivity (true positive fraction of subjects) *versus* 1-specificity (false positive fraction of subjects) at all possible cutoff points on the NRS.<sup>§</sup> The 'optimal' cutoff point is found where the vertical distance between the curve and the line of identity is maximal (Youden's J-statistic).

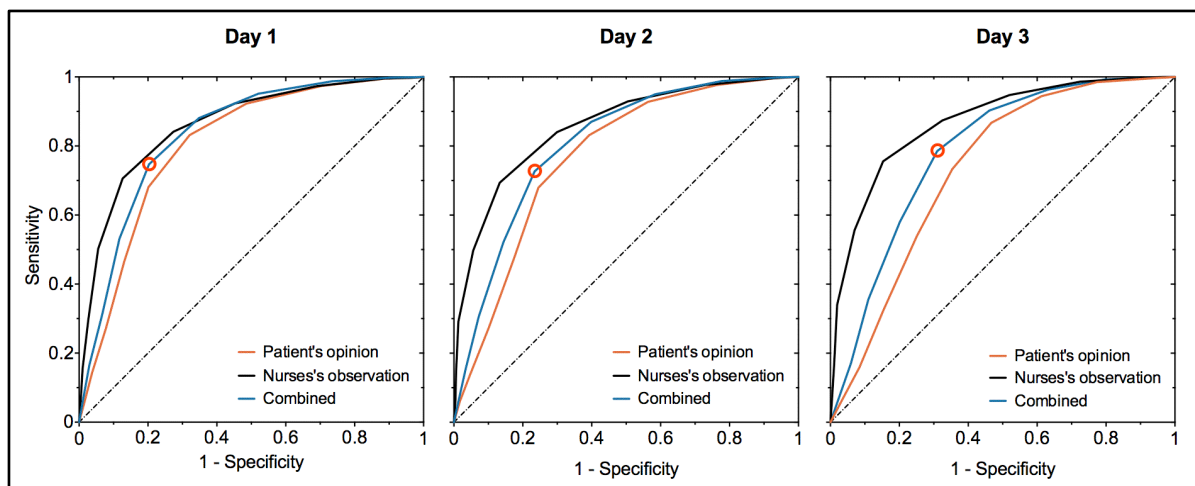

**Fig. S3.1.** ROC curves for the dependent variables PO, NO and PONO for the three first postoperative days. The dashed line is the line of identity where the AUC = 0.5. The closer the ROC curve is to the upper left corner, the better NRS discriminates. Open circles are the points where Youden's J-statistic is maximal for PONO.

<sup>†</sup> Hosmer DW and Lemeshow S. In: *Applied Logistic Regression*, 2<sup>nd</sup> Ed, Chapter 1, p.17-21. ISBN 0-471-35632-8.

<sup>††</sup> Hosmer DW and Lemeshow S. In: *Applied Logistic Regression*, 2<sup>nd</sup> Ed, Chapter 5, p.160-164.

<sup>§</sup> Galley H. Solid as a ROC. Editorial II. *Br J Anaesth* 2004; 93: 623-6. doi: 10.1093/bja/aeH247
